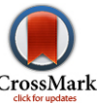

# CAM Use in Pediatric Neurology: An Exploration of Concurrent Use with Conventional Medicine

Elaine Galicia-Connolly<sup>1</sup>, Denise Adams<sup>1</sup>, Justin Bateman<sup>2</sup>, Simon Dagenais<sup>3</sup>, Tammy Clifford<sup>4,5</sup>, Lola Baydala<sup>5</sup>, W. James King<sup>6</sup>, Sunita Vohra<sup>7\*</sup>

**1** CARE Program, Department of Pediatrics, University of Alberta, Edmonton, Alberta, Canada, **2** Faculty of Medicine & Dentistry, University of Alberta, Edmonton, Alberta, Canada, **3** Palladian Health, West Seneca, New York, United States of America, **4** Departments of Pediatrics and of Epidemiology & Community Medicine, University of Ottawa, Ottawa, Ontario, Canada; Canadian Agency for Drugs and Technologies in Health, Ottawa, Ontario, Canada, **5** Department of Pediatrics, Faculty of Medicine and Dentistry, University of Alberta, Edmonton, Alberta, Canada, **6** Division of Pediatric Medicine, Department of Pediatrics, University of Ottawa, Ottawa, Ontario, Canada; Children's Hospital of Eastern Ontario, Ottawa, Ontario, Canada, **7** CARE Program, PedCAM Network, Department of Pediatrics, Faculty of Medicine & Dentistry and School of Public Health, University of Alberta, Edmonton, Alberta, Canada

## Abstract

**Background:** Previous studies have found that up to 60% of children with neurologic conditions have tried complementary and alternative medicine (CAM).

**Objective:** To assess the use of CAM among patients presenting to neurology clinics at two academic centers in Canada.

**Methods:** A survey instrument was developed to inquire about use of CAM products and therapies, including reasons for use, perceived helpfulness, and concurrent use with conventional medicine, and administered to patients or their parents/guardians at the Stollery Children's Hospital in Edmonton and the Children's Hospital of Eastern Ontario (CHEO) in Ottawa.

**Results:** Overall CAM use at the Stollery was 78%, compared to 48% at CHEO. The most common CAM products used were multi-vitamins (84%), vitamin C (37%), homeopathic remedies (24%), and fish oil/omega 3 s (22%). The most common CAM practices used were massage (47%), chiropractic (37%), faith healing (18%), aromatherapy (16%), homeopathy (16%), and relaxation (16%). Many patients used CAM products at the same time as conventional medicine but just over half (57%) discussed this concurrent use with their physician.

**Conclusion:** CAM use is common in pediatric neurology patients and most respondents felt that it was helpful, with few or no harms associated. However, this use is often undisclosed, increasing possibility of interactions with conventional drugs. We urge clinicians to inquire about CAM use during routine history taking at every patient visit. Parents would clearly like more information about CAM from their specialty clinics; such information would be easier to share if more primary data were available about the safety and effectiveness of commonly used therapies.

**Citation:** Galicia-Connolly E, Adams D, Bateman J, Dagenais S, Clifford T, et al. (2014) CAM Use in Pediatric Neurology: An Exploration of Concurrent Use with Conventional Medicine. PLoS ONE 9(4): e94078. doi:10.1371/journal.pone.0094078

**Editor:** Robert Lafrenie, Sudbury Regional Hospital, Canada

**Received:** December 17, 2013; **Accepted:** March 10, 2014; **Published:** April 15, 2014

**Copyright:** © 2014 Vohra et al. This is an open-access article distributed under the terms of the Creative Commons Attribution License, which permits unrestricted use, distribution, and reproduction in any medium, provided the original author and source are credited.

**Funding:** This project was supported by a grant from the SickKids Foundation. Sunita Vohra receives salary support from Alberta Innovates-Health Solutions (formerly Alberta Heritage Foundation for Medical Research), which is a government agency that supports research in Alberta. The funders had no role in study design, data collection and analysis, decision to publish, or preparation of the manuscript.

**Competing Interests:** Simon Dagenais is currently employed as a chiropractor in the Palladian clinic, which is not a commercial organization. At the time of this study Dr. Dagenais was not yet employed at Palladian Health and this agency did not have any involvement in or influence over the study.

\* E-mail: svohra@ualberta.ca

## Introduction

The use of complementary and alternative medicine (CAM) is common among children, particularly those with chronic, recurrent or incurable conditions [1]. For instance, a study in 2001 found that 62% of chronically ill children and adolescents attending subspecialty clinics in Salt Lake City (n = 505) had used dietary supplements [2]. Another study in 2003 found that 64% of children (n = 141) attending a rheumatology clinic in Toronto were using CAM at the time, with 50% using more than one type of CAM [3]. Among pediatric oncology patients, CAM use increased from 16% in 1977 to over 65% in the late 1990s [4–7].

CAM use has been reported for a variety of neurologic conditions, including epilepsy, headaches, traumatic brain injury, neuromuscular disorders, developmental delay, and degenerative brain diseases [8–14]. A study released in 2003 found that 14% of children with epilepsy attending a neuropsychiatric unit at an Israeli hospital were currently using CAM (n = 115), while nearly one-third had used CAM in the past [15]. A survey of 17 Chinese-Canadian children with stroke and cerebrovascular disease in Toronto found that most (53%) had used Chinese herbs [16]. In 2005, a study at the Alberta Children's Hospital neurology clinic in Calgary showed that 44% of patients used CAM, with many of those patients receiving more than one type of CAM [8].

The purpose of this study was to assess the use of CAM among pediatric neurology patients and explore beliefs and attitudes towards CAM, including perceived helpfulness, sources of and trust in CAM information sources, concurrent use with conventional drugs, disclosure of CAM use to health care providers and adverse events.

## Methods

This paper is part of a larger study that was carried out at two sites in Canada: the Stollery Children's Hospital (Stollery) in Edmonton, Alberta and the Children's Hospital of Eastern Ontario (CHEO) in Ottawa, Ontario. Five pediatric clinics were chosen for the larger study as follows: cardiology, gastrointestinal, neurology, oncology, and respiratory. These five subspecialties were chosen because many patients with chronic conditions who may be likely to use CAM products and/or therapies attend them. Participants (children and/or their families) were eligible to take part in this study if they could read French or English, were under 18 years of age, and had not previously filled out a questionnaire for this study. Full methods may be found in Adams 2013 [17]. Ethical approval was granted by the CHEO and Stollery Research Ethics Boards.

Data was entered into an SPSS database (version 11). Descriptive statistics were presented as means (standard deviation) or medians (IQR) for continuous variables and as numbers and percentages for categorical variables. Demographics, health status, use of specific CAM therapies and products, satisfaction with care and beliefs about CAM were compared by centre (Stollery vs. CHEO) using Wilcoxon tests, independent t-tests and chi-square tests. CAM use was compared between centres and modeled through logistic regression (univariate and multivariate models). Predictive variables included child's age, child's gender, child's health status, time since diagnosis, ethnicity, parental education and income, family's use of CAM, family's CAM insurance, and discussion of CAM with conventional medical practitioners. Regression diagnostics such as c-statistics, r-squared and Hosmer and Lemeshow lack-of-fit statistics were performed and measures for detecting influential observations and outliers were also considered.

## Results

### Population Characteristics

A total of 206 surveys were completed, including 151 (73.3%) at Stollery and 55 (26.7%) at CHEO, with an equal proportion of male and female patients, and a mean age of 9.6 years. Patient ethnicity was self-identified as Caucasian/Canadian/French Canadian (86.7%), First Nations/Inuit/Metis (9.7%), South Asian (4.6%), Black (4.1%), East Asian (2.0%), Middle Eastern/Arabic (1.0%), or Latin American/Hispanic (0.5%). Most patients reported their health status as good to excellent (92.7%) and had received their diagnosis more than 12 months ago (62.3%). The most common diagnosis was epilepsy (50.5%), followed by headaches/migraines (9.2%) and cerebral palsy (4.9%). More than three-quarters (77.5%) of Stollery patients had previously used CAM, compared to half (48.1%) at CHEO ( $p < 0.0001$ ) (Table 1).

Parents/caregivers in attendance at the clinic had a mean age of 39.3 years and were mostly mothers (84.2%). Over 70% reported attending post-secondary education and 80.2% reported a household income of \$40,000 or more. Most (94%) respondents reported that they were knowledgeable about the child's use of CAM. Among the parents/caregivers, 73.8% of those at the

Stollery had used CAM before, compared to 59.3% at CHEO ( $p = 0.0455$ ). Use of CAM by Stollery patients was found to be 21 times higher when parents/caregivers also used CAM (95% confidence interval (CI): 7.6–58.2,  $p < 0.0001$ ); no such association was found for CHEO patients.

### Products/Practices

The most common CAM products (also known as natural health products) ever used were multi-vitamins (89.9%), vitamin C (36.7%), cold remedies (23.7%), teething remedies (21.6%), ear drops (17.3%), and fish oils/omega 3 s (21.6%). Patients whose CAM use was limited to multivitamins/minerals accounted for only 11% of respondents (14% at Stollery and 0% at CHEO,  $p < 0.0001$ ). The most common CAM practices ever used were massage (47.1%), chiropractic (36.8%), faith healing (18.4%), aromatherapy (16.1%), and relaxation (16.1%). Most products and practices were reported to be helpful. More details on previous and current CAM use, as well as their perceived helpfulness, is presented in Table 2. Common reasons for not using CAM reported for both caregivers and children included not knowing enough about CAM, not believing it to be necessary for them, and worry about side effects from combining CAM with conventional care.

### Safety Issues

Only 8.7% of respondents used CAM before trying conventional medicine, while 46.1% reported concurrent use of CAM and conventional medicine. Children at CHEO reported significantly more concurrent use of CAM (66.7%) than those at Stollery (41.5%) ( $p = 0.03$ ). Of the 77 respondents who reported concurrent use of CAM with prescription drugs, 74 (96%) listed the types of drugs and CAM products or practices involved (Table 3). The most common combination reported was concurrent use of anticonvulsant drugs and vitamins/minerals ( $n = 34$ ), followed by anticonvulsant drugs and herbal products ( $n = 7$ ), and psychostimulants and vitamins/minerals ( $n = 6$ ).

Twenty-one side effects were reported, with most being minor (i.e. self-resolving; not needing medical care). However, five side effects of moderate severity (i.e. medical care was sought) were also reported, one each for multi-vitamins, Echinacea, teething remedy, aromatherapy, and yoga. Only two severe side effects were reported, associated with multi-vitamins ( $n = 1$ ) and magnets ( $n = 1$ ). No further details were provided by respondents.

The most commonly used sources of information about CAM included families (63.7%), pharmacies (44.4%), books (38.7%), and the Internet (37.1%). The most trusted sources of information about CAM (on a 0–10 scale) were conventional health care providers (8.4), pharmacies (8.2), CAM providers (8.1), and their neurology clinic (7.9). Health food stores were perceived as more trustworthy sources of information at CHEO (8.8) than at the Stollery (6.7) ( $p = 0.03$ ).

Among those who reported using CAM and conventional drugs concurrently, 56.8% consulted their medical doctor about this use, and 43.5% reported consulting their pharmacist. Although a large majority (81.1%) of respondents agreed or strongly agreed that they felt comfortable discussing CAM at the neurology clinic, most (66.3%) reported that they would like more information on CAM use at the neurology clinic, and would be more likely to use CAM products (61.3%) and practices (64.3%) if they were made available in the neurology clinic.

**Table 1.** Demographic Information.

|                                                  | n   | Edmonton   | n  | Ottawa     | Total      |
|--------------------------------------------------|-----|------------|----|------------|------------|
| <b>Patient Information</b>                       |     |            |    |            |            |
| Child/Youth Age mean (SD)                        | 151 | 9.3 (4.9)  | 54 | 10.3 (4.6) | 9.6 (4.8)  |
| Gender Female N (%)                              | 151 | 78 (51.7)  | 54 | 31 (57.4)  | 109 (53.2) |
| Time since diagnosis                             | 146 |            | 53 |            |            |
| 0–3 mo* o>e 0.0214                               |     | 11 (7.5)   |    | 10 (18.9)  | 21 (10.6)  |
| 3–6 mo                                           |     | 13 (8.9)   |    | 5 (9.4)    | 18 (9.0)   |
| 6–12 mo                                          |     | 28 (19.2)  |    | 8 (15.1)   | 36 (18.1)  |
| more than 12 mo                                  |     | 94 (64.4)  |    | 30 (56.6)  | 124 (62.3) |
| If child/youth has ever used Cam Yes*e>o <0.0001 | 151 | 117 (77.5) | 54 | 26 (48.1)  | 143 (69.8) |
| <b>Parent/Caregiver Information</b>              |     |            |    |            |            |
| Age mean (SD)                                    | 146 | 39.4 (7.6) | 51 | 39 (7.5)   | 39.3 (7.6) |
| Gender Female N (%)                              | 149 | 133 (89.3) | 54 | 49 (90.7)  | 182 (89.7) |
| Highest completed level of education             | 145 |            | 53 |            |            |
| No formal education                              |     | 1 (0.7)    |    | 0          | 1 (0.5)    |
| Primary school only                              |     | 1 (0.7)    |    | 2 (3.8)    | 3 (1.5)    |
| Secondary school                                 |     | 31 (21.4)  |    | 12 (22.6)  | 43 (21.7)  |
| Registered apprentice or other trade             |     | 6 (4.1)    |    | 2 (3.8)    | 8 (4.0)    |
| College, CEGEP, or other non-university          |     | 53 (36.6)  |    | 14 (26.4)  | 67 (33.8)  |
| University, without a university degree          |     | 14 (9.7)   |    | 2 (3.8)    | 16 (8.1)   |
| University, with a university degree             |     | 32 (22.1)  |    | 21 (39.6)  | 53 (26.8)  |
| Other                                            |     | 7 (4.8)    |    | 0          | 7 (3.5)    |
| Annual household income                          | 142 |            | 50 |            |            |
| Less than \$10,000                               |     | 5 (3.5)    |    | 0          | 5 (2.6)    |
| \$10,000–\$19,999                                |     | 6 (4.2)    |    | 2 (4.0)    | 8 (4.2)    |
| \$20,000–\$39,999                                |     | 17 (12.0)  |    | 8 (16.0)   | 25 (13.0)  |
| \$40,000–\$79,999                                |     | 48 (33.8)  |    | 18 (36.0)  | 66 (34.4)  |
| \$80,000 and over                                |     | 66 (46.5)  |    | 22 (44.0)  | 88 (45.8)  |
| If respondent had ever used CAM Yes*e>o 0.0455   | 149 | 110 (73.8) | 54 | 32 (59.3)  | 142 (70.0) |

\*- multiple responses allowed.

n - number with valid response.

doi:10.1371/journal.pone.0094078.t001

## Discussion

This study details the prevalence and patterns of use of CAM in pediatric neurology clinics at two academic institutions. Use between our two sites was significantly different (74% vs 59%) and statistical modeling showed that the only variable that influenced child CAM use was parent CAM use; however this was only evident at the Stollery and it is likely that our small sample size at CHEO did not allow us to detect influence at that site. Other variables that approached significance were child age, parent education and CAM insurance status.

A study based on the US National Health statistics in 2007 reported that CAM use among children was five times higher when the parent used CAM. Other factors associated with CAM use were higher parent education and income, access to private health insurance, worries over cost delayed receipt of conventional care and the inability to afford conventional medical care [18,19]. Our study supports the importance of these variables in predicting child CAM use.

Multivitamins/nutritional supplements, massage, and chiropractic care were the most commonly used CAM. Recent evidence

supports the use of some types of CAM for neurologic conditions [20] such as biofeedback or neurofeedback for chronic pediatric headaches [21] and fish oil supplements for ADHD [22]. However, evidence for other types of CAM is limited, including for vitamins [23], ketogenic diet [24], acupuncture [25] or yoga [26]. CAM approaches warrant further study, as patients and families are interested in alternatives to conventional pharmacotherapy.

Similar to Soo et al. [8], most of our respondents perceived that CAM products or therapies were generally helpful, with few moderate or severe side effects, but only half discussed their child's CAM use with their physician.

Novel information that our study provides includes an exploration of concurrent use of CAM and conventional medicine, including rates and patterns of use as well as safety and related disclosure to health care providers. We also investigated issues of such as source and trust in CAM info sources as well as information needs of participants in relation to their neurology clinic.

Concurrent use of CAM and prescription medications was common, which may be attributed to comorbidities among

**Table 2.** Commonly Used Products/Practices and their Perceived Helpfulness.

| Product                      | Ever Used         | Current Use      | Perceived Helpfulness No. (%) |             |
|------------------------------|-------------------|------------------|-------------------------------|-------------|
|                              | (n = 139) No. (%) | (n = 73) No. (%) | n                             | Yes No. (%) |
| <i>Vitamins and Minerals</i> | 125 (89.9)        | 63 (86.3)        |                               |             |
| Multi-vitamin                | 116 (83.5)        | 56 (76.7)        | 105                           | 52 (49.5)   |
| Folic Acid                   | 12 (8.6)          | 7 (9.6)          | 10                            | 6 (60.0)    |
| Vitamin B                    | 18 (12.9)         | 8 (11)           | 15                            | 6 (40.0)    |
| Vitamin C                    | 51 (36.7)         | 18 (24.7)        | 43                            | 27 (62.8)   |
| Calcium                      | 22 (15.8)         | 11 (15.1)        | 19                            | 9 (47.4)    |
| <i>Herbals</i>               | 35 (25.2)         | 13 (17.8)        |                               |             |
| Echinacea                    | 22 (15.8)         | 3 (4.1)          | 21                            | 13 (61.9)   |
| Goldenseal                   | 9 (6.5)           | 6 (8.2)          | 8                             | 4 (50.0)    |
| Peppermint                   | 11 (7.9)          | 4 (5.5)          | 9                             | 7 (77.8)    |
| <i>Homeopathics</i>          | 53 (38.1)         | 9 (12.3)         |                               |             |
| Cold remedy                  | 33 (23.7)         | 7 (9.6)          | 29                            | 24 (82.8)   |
| Colic remedy                 | 16 (11.5)         | 1 (1.4)          | 13                            | 8 (61.5)    |
| Ear drops                    | 24 (17.3)         | 2 (2.7)          | 17                            | 14 (82.4)   |
| Teething remedy              | 30 (21.6)         | 0                | 23                            | 20 (87.0)   |
| <i>Miscellaneous</i>         | 47 (33.8)         | 22 (30.1)        |                               |             |
| Acidophilus/probiotics       | 14 (10.1)         | 7 (9.6)          | 12                            | 5 (41.7)    |
| Fish oil/omega 3 s *         | 30 (21.6)         | 14 (19.2)        | 26                            | 11 (42.3)   |
| Flax oil                     | 11 (7.9)          | 2 (2.7)          | 9                             | 8 (88.9)    |
| Other **                     | 19 (13.7)         | 10 (13.7)        | NA                            | NA          |
| <b>Practice</b>              | N = 87            | N = 37           |                               |             |
| Aboriginal Healing           | 8 (9.2)           | 3 (8.1)          | 7                             | 7 (100)     |
| Acupuncture                  | 8 (9.2)           | 1 (2.7)          | 7                             | 4 (57.1)    |
| Aromatherapy                 | 14 (16.1)         | 4 (10.8)         | 13                            | 7 (53.8)    |
| Chiropractic                 | 32 (36.8)         | 6 (16.2)         | 32                            | 23 (71.9)   |
| Faith healing                | 16 (18.4)         | 7 (18.9)         | 13                            | 12 (92.3)   |
| Homeopathy                   | 14 (16.1)         | 2 (5.4)          | 11                            | 9 (81.8)    |
| Magnets                      | 6 (6.9)           | 1 (2.7)          | 5                             | 2 (40.0)    |
| Massage                      | 41 (47.1)         | 13 (35.1)        | 35                            | 28 (80.0)   |
| Naturopathy                  | 9 (10.3)          | 1 (2.7)          | 9                             | 7 (77.8)    |
| Relaxation                   | 14 (16.1)         | 8 (21.6)         | 10                            | 8 (80.0)    |
| Yoga                         | 8 (9.2)           | 3 (8.1)          | 8                             | 2 (100)     |

\*use of fish oil ever at CHEO (40.0%) was significantly more than at the Stollery (17.5%),  $p=0.0134$ .

\*\*neutralizer to vaccine, yogurt capsule, wheat germ, flax, Q10, cranberry, Manatech, melatonin, sea salt, fiber.

doi:10.1371/journal.pone.0094078.t002

patients with neurological conditions such as epilepsy, migraines, and ADHD; the side effects common to many pharmacologic therapies for these conditions; and their somewhat chronic or refractory nature [27]. Just over half of our population was diagnosed with epilepsy. Epilepsy patients who concomitantly use herbs, vitamins and minerals with their antiepileptic drugs (AED) are at potential risk of drug interactions or serious adverse events. For example, herbs and supplements (i.e. Echinaceae, evening primrose oil, ginkgo biloba), are known to decrease seizure threshold [28,29], while vitamins can have a direct convulsant effect (folic acid), alter drug metabolism (niacin, pyridoxine), or reverse the effects of antiseizure medications to worsen seizure control (folic acid) [30].

Although health care providers were considered the most trusted source for CAM information, over 40% of patients did not discuss concurrent drug-CAM use with their physicians. This finding is of concern and provides an opportunity to recommend updating medical training to not only elicit CAM use, but more importantly, to equip future physicians to confidently address the efficacy and safety of CAM in their patients. Patients may also feel more inclined to be open with their physicians if CAM use was integrated with a patient's medication history. We recommend that clinicians routinely inquire about CAM use during each visit, keeping in mind that some patients may fail to disclose this information for fear of being reprimanded by their physician. Open honest communication between patient and physician is more likely when physicians do not have a judgmental attitude

**Table 3.** Conventional and CAM concurrent use.

| Therapeutic agent                                              | CAM products used concurrently |
|----------------------------------------------------------------|--------------------------------|
| Anticonvulsant agents*                                         | Vitamins and minerals          |
|                                                                | Herbals                        |
|                                                                | Homeopathics                   |
|                                                                | Probiotics                     |
| Psychostimulants (i.e. Cocerta, Ritalin, Dexedrine, Strattera) | Fish oil/Omega 3               |
|                                                                | Vitamins and minerals          |
|                                                                | Herbals                        |
|                                                                | Probiotics                     |
| Antibiotics                                                    | Fish oil/Omega 3               |
|                                                                | Vitamins and minerals          |
|                                                                | Probiotics                     |
|                                                                | Fish oil/Omega 3               |
| Antipsychotics (i.e. risperdal)                                | Vitamins and minerals          |
|                                                                | Herbals                        |
|                                                                | Probiotics                     |
|                                                                | Fish oil/Omega 3               |
| Antidepressants                                                | Vitamins and minerals          |
|                                                                | Herbals                        |
|                                                                | Fish oil/Omega 3               |
| Others**                                                       | Vitamins and minerals          |
|                                                                | Probiotics                     |

\*Includes seizure medications;

\*\*Antacids or Antiemetics (4), Diuretics (1), Inhalers (5).

doi:10.1371/journal.pone.0094078.t003

regarding their patients' CAM use [31]. Useful resources for clinicians regarding the safety and efficacy of pediatric CAM include the American Academy of Pediatrics *Pediatrics in Review* CAM series (Headaches PIR Feb 2010, Fish oils and Neurodevelopmental disorders PIR Apr 2009, Learning Disabilities Feb 2011), the rapid tool for checking for herbal and drug interaction [32], subscription databases, such as Natural Standard and Natural Medicines Comprehensive Database, and open access websites, such as NCCAM (www.nih.nccam.gov) and PedCAM (www.pedcam.ca).

Limitations of this study include those of recall of events long past, which may be exacerbated by our use of a parent proxy, however, parents are routinely asked about aspects of their child's health and often, this discourse occurs during an annual medical check-up. In addition, recent evidence suggests that recall of regularly consumed natural health products, measured by a single questionnaire, is comparable to more detailed methods such as use of a diary [33]. Our choice of a period prevalence less than a full calendar year could result in estimates of CAM use that are confounded by the season during which the survey was completed. Because CAM use is known to vary between ethnic groups [9,34–

37], administration of our questionnaires in English or French only may limit the generalizability of our findings.

## Conclusions

CAM use is common in pediatric neurology patients and most respondents felt that it was helpful, with few or no associated harms. However CAM use is often undisclosed to physicians and pharmacists, increasing the possibility of interactions with conventional drugs – we urge clinicians to inquire about CAM use during routine history taking at every patient visit. Parents would clearly like more information about CAM from their specialty clinics; such information would be easier to share if more primary data were available about the safety and effectiveness of commonly used therapies.

## Author Contributions

Conceived and designed the experiments: SV DA SD TC LB WJK. Performed the experiments: SV DA SD TC LB WJK EG-CJB. Analyzed the data: SV DA SD TC LB WJK EG-CJB. Wrote the paper: SV DA SD TC LB WJK EG-CJB.

## References

- Kemper KJ, Vohra S, Walls R (2008) The use of complementary and alternative medicine in pediatrics. *Pediatrics* 122(6): 1374–1386.
- Ball SD, Kertesz D, Moyer-Mileur IJ (2005) Dietary supplement use is prevalent among children with a chronic illness. *J Am Diet Assoc* 105(1): 78–84.
- Hagen LE, Schneider R, Stephens D, Modrusan D, Feldman BM (2003) Use of complementary and alternative medicine by pediatric rheumatology patients. *Arthritis Rheum* 49(1): 3–6.
- Fernandez CV, Stutzer CA, MacWilliam L, Fryer C (1998) Alternative and complementary therapy use in pediatric oncology patients in British Columbia: prevalence and reasons for use. *J Clin Oncol* 16(4): 1279–1286.
- Pendergrass TW, Davies S (1981) Knowledge and use of "Alternative" cancer therapies in children. *Amer J Pediatr Hematol Oncol* 3(4): 339–345.
- Friedman T, Slayton WB, Allen LS, Pollock BH, Dumont-Driscoll M, et al. (1997) Use of alternative therapies for children with cancer. *Pediatrics* 100(6): E1.
- Neuhouser ML, Patterson RE, Schwartz SM, Hedderson MM, Bowen DJ, et al. (2001) Use of alternative medicine by children with cancer in Washington State. *Prev Med* 33(5): 347–354.

8. Soo I, Mah JK, Barlow K, Hamiwka L, Wirrell E (2005) Use of complementary and alternative medical therapies in a pediatric neurology clinic. *Can J Neurol Sci* 32(4): 524–528.
9. Levy SE, Mandell DS, Merhar S, Ittenbach RF, Pinto-martin JA (2003) Use of complementary and alternative medicine among children recently diagnosed with autistic spectrum disorder. *J Dev Behav Pediatr* 24(6): 418–423.
10. Harrington JW, Rosen L, Garnecho A, Patrick PA (2006) Parental perceptions and use of complementary and alternative medicine practices for children with autistic spectrum disorders in private practice. *J Dev Behav Pediatr (Suppl 2)*: S156–S161.
11. Hurvitz EA, Leonard C, Ayyangar R, Nelson VS (2003) Complementary and alternative medicine use in families of children with cerebral palsy. *Dev Med Child Neurol* 45(6): 364–370.
12. Sinha D, Efron D (2005) Complementary and alternative medicine use in children with attention deficit hyperactivity disorder. *J Paediatr Child Health* 41(1–2): 23–26.
13. Hanson E, Kalish LA, Bunce E, Curtis C, McDaniel S, et al. (2007) Use of complementary and alternative medicine among children diagnosed with autism spectrum disorder. *J Autism Dev Disord* 37(4): 628–636.
14. Christon LM, Mackintosh VH, Myers BJ (2010) Use of complementary and alternative medicine (CAM) treatments by parents of children with autism spectrum disorders. *Res Autism Spectr Disord* 4(2): 249–259.
15. Gross-Tsur V, Lahad A, Shalev RS (2003) Use of complementary medicine in children with attention deficit hyperactivity disorder and epilepsy. *Pediatr Neurol* 29(1): 53–55.
16. Golomb MR, Hune S, MacGregor DL, deVeber GA (2003) Alternative therapy use by Chinese-Canadian children with stroke and cerebrovascular disease. *J Child Neurol* 18(10): 714–717.
17. Adams D, Dagenais S, Clifford T, Baydala L, King WJ, et al. (2013) Complementary and alternative medicine use by pediatric specialty outpatients. *Pediatrics* 131(2): 225–232.
18. Birdee GS, Phillips RS, Davis RB, Gardiner P (2010) Factors associated with pediatric use of complementary and alternative medicine. *Pediatrics* 125(2): 249–256.
19. Barnes PM, Bloom B, Nahin RL (2008) Complementary and alternative medicine use among adults and children: United States, 2007. *Natl Health Stat Report* 12: 1–23.
20. Devinsky O, Schachter S, Pacia S (Eds) (2005) *Complementary and alternative therapies for epilepsy*. New York: Demos Medical Publishing; e129.
21. Kemper KJ, Breuner CC (2010) Complementary, holistic, and integrative medicine: headaches. *Pediatr Rev* 31(2): e17–23.
22. Weber W, Newmark S (2007) Complementary and alternative medical therapies for attention-deficit/hyperactivity disorder and autism. *Pediatr Clin North Am* 54(6): 983–1006.
23. Ranganathan LN, Ramaratnam S (2005) Vitamins for epilepsy. *Cochrane Database Syst Rev* 2: CD004304.
24. Levy R, Cooper P (2003) Ketogenic diet for epilepsy. *Cochrane Database Syst Rev* 3: CD001903.
25. Cheuk DK, Wong V (2008) Acupuncture for epilepsy. *Cochrane Database Syst Rev* 4: CD005062.
26. Ramaratnam S, Baker GA, Goldstein LH (2009) Psychological treatments for epilepsy. *Cochrane Database Syst Rev* 3: CD002029.
27. Ricotti V, Delanty N (2006) Use of complementary and alternative medicine in epilepsy. *Curr Neurol Neurosci Rep* 6(4): 347–353.
28. Sirven JI (2007) Alternative therapies for seizures: promises and dangers. *Semin Neurol* 27(4): 325–330.
29. Samuels N, Finkelstein Y, Singer SR, Oberbaum M (2008) Herbal medicine and epilepsy: proconvulsive effects and interactions with antiepileptic drugs. *Epilepsia* 49(3): 373–380.
30. Rogovik AL, Vohra S, Goldman RD (2010) Safety considerations and potential interactions of vitamins: should vitamins be considered drugs? *Ann Pharmacother* 44(2): 311–324.
31. Maha N, Shaw A (2007) Academic doctors' views of complementary and alternative medicine (CAM) and its role within the NHS: an exploratory qualitative study. *BMC Complement Altern Med* 7: 17.
32. Cvijovic K, Boon H, Barnes J, Brulotte J, Jaeger W, et al. (2009) A tool for rapid identification of potential herbal medicine drug interactions. *Can Pharmacists J* 142(5): 224–227.
33. Murphy SP, ilkens LR, ankin JH, oote JA, Monroe KR, et al. (2002) Comparison of two instruments for quantifying intake of vitamin and mineral supplements: a brief questionnaire versus three 24-hour recalls. *Am J Epidemiol* 156(7): 669–675.
34. Armishaw J, Grant CC (1999) Use of complementary treatment by those hospitalised with acute illness. *Arch Dis Child* 81(2): 133–137.
35. Mazur IJ, De Ybarondo L, Miller J, Colasur G (2001) Use of alternative and complementary therapies for pediatric asthma. *Tex Med* 97(6): 64–68.
36. Johnston GA, Bilbao RM, Graham-Brown RA (2004) The use of dietary manipulation by parents of children with atopic dermatitis. *Br J Dermatol* 150(6): 1186–1189.
37. Lim JY, Wong MZ, Chan MY, Tan AM, Rajalingam V, et al. (2004) Use of complementary and alternative medicine in paediatric oncology patients in Singapore. *Ann Acad Med Singapore (Suppl 5)*: S76–S77.
